# Supplementary material for: HvSL1 and HvMADS16 promote stamen identity to restrict multiple ovary formation in barley
Source: PubMed Central journal article supplement (PMC10498024; doi:10.1093/jxb/erad218), 2023-06-03
Supplement: erad218_suppl_supplementary_tables_s1-s5_figures_s1-s13.pdf [file erad218_suppl_supplementary_tables_s1-s5_figures_s1-s13.pdf]

# Supplementary Information

**Title:** *HvSL1* and *HvMADS16* promote stamen identity to restrict multiple ovary formation in barley

**Authors:** C. Selva, X. Yang, N. J. Shirley, R. Whitford, U. Baumann, M. R. Tucker

Corresponding Author

Associate Professor Matthew R. Tucker

*Email:* [matthew.tucker@adelaide.edu.au](mailto:matthew.tucker@adelaide.edu.au)

*Phone:* +61-8-83139241

## Supplementary Information Legend

**Supplementary Table S1.** Primer sequences and Taqman probes used for copy number analysis to genotype *mov2.g* and *mov1* plants.

**Supplementary Table S2.** Sequence of KASP™ markers on chromosomes 3H used to map the *mov2* locus.

**Supplementary Table S3.** PCR primer sequences for testing the presence of genes upstream and downstream from *HvSL1* on chromosome 3H.

**Supplementary Table S4.** PCR primer sequences for testing the presence of barley B-class genes.

**Supplementary Table S5.** PCR primer sequences for testing the presence of genes upstream and downstream from *HvMADS16* on chromosome 7H.

**Supplementary Table S6.** qRT-PCR primer sequences.

**Supplementary Table S7.** Primer sequences for *HvSL1* CRISPR knockout.

**Supplementary Table S8.** Primer sequence for cloning of *in situ* hybridization antisense and sense probes.

**Supplementary Table S9.** Primer sequences for BiFC cloning.

**Supplementary Table S10.** Floral organ frequency in wild-type and *mov2.g*.

**Supplementary Table S11.** Annotated genes present in the mapped *mov2* critical interval between flanking markers chr3H\_9748112 and chr3H\_10289104.

**Supplementary Table S12.** BLASTp results using barley *HvSL1* as query against the rice genome.

**Supplementary Table S13.** BLASTp results using rice *OsSL1* as query against the barley genome.

**Supplementary Table S14.** Observed segregation ratios of *mov1* phenotype in heterozygous growing material.

**Supplementary Table S15.** Genes on chromosome 7H tested by PCR.

**Supplementary Fig. S1.** Histological sections of *mov2.g* carpels.

**Supplementary Fig. S2.** Spike morphology of wild-type and *mov2.g* plants.

**Supplementary Fig. S3.** Mapping of the *mov2* locus in a *mov2.g* x Morex bi-parental population.

**Supplementary Fig. S4.** Heatmap of gene expression for genes in the critical *mov2* interval.

**Supplementary Fig. S5.** *HvSL1* and *OsSL1* gene models and alignment.

**Supplementary Fig. S6.** *HvSL1* deletion in *mov2.g*.

**Supplementary Fig. S7.** CRISPR design and analysis of *Hvsl1*-knockout plants.

**Supplementary Fig. S8.** BiFC assays showing interaction between barley B-class genes.

**Supplementary Fig. S9.** Transfection efficiency and transcript abundance in barley protoplasts.

**Supplementary Fig. S10.** Histological sections of *mov1* carpels.

**Supplementary Fig. S11.** Details of *mov1* inflorescence development.

**Supplementary Fig. S12.** Characterization of *mov1* deletion and *HvMADS16*.

**Supplementary Fig. S13.** *In situ* hybridization with sense probes on wild-type and *mov1* inflorescences.

**Supplementary Table S1.** Primer sequences and Taqman probes used for copy number analysis to genotype *mov2.g* and *mov1* plants. Fluorophore at 5' and 3' quencher are indicated for each probe.

| Gene name        | Gene ID                 | Primer sequences                                    | Taqman probe                            |
|------------------|-------------------------|-----------------------------------------------------|-----------------------------------------|
| <i>HvCO-like</i> | <i>HORVU6Hr1G072620</i> | TGCTAACCGTGTGGCATCAC<br>GGTACATAGTGCTGCTGCATCTG     | [HEX]CATGAGCGTGTGCGTGTCTGCG[BHQ1]       |
| <i>HvSL1</i>     | <i>HORVU3Hr1G003740</i> | GGAGGAGGAGGATTACAGGGGAGG<br>GCGTCGTGCTGTAGAGGTAGTGG | [FAM]TCGGAGACCCAAGCCACCACCATT[BHQ1]     |
| <i>HvMADS16</i>  | <i>HORVU7Hr1G091210</i> | GTTTACCTTGCCCTGTGTGCG<br>ACGAACTGCTTTCTCAAACG       | [FAM]AGTTCTCCATGCCACTGCTCAAACACCA[BHQ1] |

**Supplementary Table S2.** Sequence of KASP<sup>TM</sup> markers on chromosomes 3H used to map the *mov2* locus. Flanking markers are indicated in bold. Marker order is based on the genetic map.

| Marker name                  | Forward primer Allele 1                                  | Forward primer Allele 2                                    | Reverse Common primer              | SNP   |
|------------------------------|----------------------------------------------------------|------------------------------------------------------------|------------------------------------|-------|
| chr3H_28805649 <sup>1</sup>  | GAAGGTGACCAAGTTCATGCTC<br>GACGGTCCATTCTGCAC              | GAAGGTCGGAGTCAACGGATT<br>GCTCGACGGTCCATTCTGCAA             | TCTTGATGCTGACATGT<br>ATATGTTCTTGAT | [T/A] |
| chr3H_1006543 <sup>1,2</sup> | GAAGGTGACCAAGTTCATGCTA<br>AGCTTGATTTCCACATGACCAA<br>TTTC | GAAGGTCGGAGTCAACGGATT<br>CTAAGCTTGATTTCCACATGACC<br>AATTTT | ACTCCTCCATGGCCTG<br>ACCTT          | [G/A] |
| chr3H_1367441 <sup>2</sup>   | GAAGGTGACCAAGTTCATGCTC<br>TCCGGATTCTTCAAGAGCTCT          | GAAGGTCGGAGTCAACGGATT<br>CTCCGGATTCTTCAAGAGCTCC            | GCGTCGGAGGTGGGG<br>AGGTT           | [T/C] |
| chr3H_3865263 <sup>2</sup>   | GAAGGTGACCAAGTTCATGCTG<br>AAACCATATACCATAGCAGCAG<br>CAA  | GAAGGTCGGAGTCAACGGATT<br>AAACCATATACCATAGCAGCAG<br>CAG     | CAAATGCTTTACTCATA<br>ACGGCGGCAT    | [A/G] |
| chr3H_7767159 <sup>3</sup>   | GAAGGTGACCAAGTTCATGCTC<br>GATCGGCGAGGACGAGACA            | GAAGGTCGGAGTCAACGGATT<br>GATCGGCGAGGACGAGACG               | CCCACCGTCGAGACTC<br>CGATA          | [A/G] |
| chr3H_7767871 <sup>2,3</sup> | GAAGGTGACCAAGTTCATGCTA<br>ACGTTGATGCTCTTACCAATG<br>GT    | GAAGGTCGGAGTCAACGGATT<br>CGTTGATGCTCTTACCAATGGC            | TTCAGCCTGAGCTTGA<br>ATGGGACTT      | [A/G] |
| chr3H_8709612 <sup>3</sup>   | GAAGGTGACCAAGTTCATGCTG<br>TGTGATGGACCGCCTCGT             | GAAGGTCGGAGTCAACGGATT<br>GTGATGGACCGCCTCGC                 | CTCCCTCCAATGCACA<br>CCGAT          | [A/G] |
| chr3H_8787424 <sup>3</sup>   | GAAGGTGACCAAGTTCATGCTA<br>TGTAAGTTTCTAGATGATGCAA<br>GGC  | GAAGGTCGGAGTCAACGGATT<br>GATGTAAGTTTCTAGATGATG<br>CAAGGA   | CATTTTCCAAGTTTCTT<br>GCCACAGTTTT   | [G/T] |
| chr3H_8744266 <sup>3</sup>   | GAAGGTGACCAAGTTCATGCTG<br>GTCGTAACAAATTATCTACCTGC        | GAAGGTCGGAGTCAACGGATT<br>GTGGTCGTAACAAATTATCTA<br>CCTGT    | GGAATTTGACCCCTG<br>ACCATGTTA       | [C/T] |
| chr3H_8969648 <sup>3</sup>   | GAAGGTGACCAAGTTCATGCTC<br>CCGTCTCCGTCGCCGG               | GAAGGTCGGAGTCAACGGATT<br>CCCGTCTCCGTCGCCGC                 | CTCCAGATGTCGTCGTC<br>GTGGAA        | [C/G] |
| chr3H_9095799 <sup>3</sup>   | GAAGGTGACCAAGTTCATGCTA<br>CGCGCAGGTGATGCACCG             | GAAGGTCGGAGTCAACGGATT<br>GACGCGCAGGTGATGCACCA              | GCCCTCCACGGCGTCC<br>TCTT           | [G/A] |
| chr3H_9356192 <sup>4</sup>   | GAAGGTGACCAAGTTCATGCTG<br>GTTGCATCGATCGACGCCG            | GAAGGTCGGAGTCAACGGATT<br>CGTTGATCGATCGACGCCA               | GCCCTTTTCTCTCCGGG<br>CATCAT        | [C/T] |

|                             |                                                                   |                                                                   |                                           |       |
|-----------------------------|-------------------------------------------------------------------|-------------------------------------------------------------------|-------------------------------------------|-------|
| chr3H_9347808 <sup>4</sup>  | GAAGGTGACCAAGTTCATGCTC<br>TATAGAGAATGGAGTAGTCTAT<br>AC            | GAAGGTCGGAGTCAACGGATT<br>GCTCTATAGAGAATGGAGTAGT<br>CTATAT         | CACAACAGGTAGGATA<br>GCTAGAACTATA          | [G/A] |
| chr3H_9748112 <sup>4</sup>  | <b>GAAGGTGACCAAGTTCATGCTA<br/>TCAAACGCCAATCAAGGTTACT<br/>TTAC</b> | <b>GAAGGTCGGAGTCAACGGATT<br/>ATCAAACGCCAATCAAGGTTAC<br/>TTTAG</b> | <b>CCCTGAAATGAATAAC<br/>CTTTTTTAGGGAA</b> | [C/G] |
| chr3H_10289104 <sup>4</sup> | <b>GAAGGTGACCAAGTTCATGCTG<br/>GCGGCGGGAGGCTCTG</b>                | <b>GAAGGTCGGAGTCAACGGATT<br/>GGCGGCGGGAGGCTCTC</b>                | <b>CCCCGTCAAAGCCTCC<br/>CAAGAA</b>        | [G/C] |
| chr3H_10601795 <sup>4</sup> | GAAGGTGACCAAGTTCATGCTG<br>TTTGGGGCTTACTATGTGCCA                   | GAAGGTCGGAGTCAACGGATT<br>GTTTGGGGCTTACTATGTGCCG                   | CCACACACGTGAACAC<br>RTTCAGGAT             | [A/G] |
| chr3H_10797294 <sup>4</sup> | GAAGGTGACCAAGTTCATGCTA<br>TGTTGGCGACGCTTCTCCTC                    | GAAGGTCGGAGTCAACGGATT<br>GATGTTGGCGACGCTTCTCCTA                   | TTTGAGCAGTAGCKGT<br>GCAGCCAT              | [C/A] |
| chr3H_11039299 <sup>3</sup> | GAAGGTGACCAAGTTCATGCTC<br>CAGGTCTTCGAGTGCCCC                      | GAAGGTCGGAGTCAACGGATT<br>CCAGGTCTTCGAGTGCCCC                      | GCCCGCAGGACTTGCA<br>GGTTTT                | [C/G] |
| chr3H_11335959 <sup>3</sup> | GAAGGTGACCAAGTTCATGCTC<br>CGGCGTACGAGTACCCG                       | GAAGGTCGGAGTCAACGGATT<br>CCGCGTACGAGTACCCG                        | GTTACCGGGGRGCTGC<br>TGGTT                 | [G/C] |
| chr3H_11617707 <sup>3</sup> | GAAGGTGACCAAGTTCATGCTA<br>CTTGCTCCAATAATCACAGCTCTC                | GAAGGTCGGAGTCAACGGATT<br>CACTTGCTCCAATAATCACAGCT<br>CTA           | AGGGTATTTGAAGATC<br>GTATGGATCTCAT         | [G/T] |
| chr3H_11702941 <sup>3</sup> | GAAGGTGACCAAGTTCATGCTG<br>ACAGCCGTTTCGTGCGCCACA                   | GAAGGTCGGAGTCAACGGATT<br>CAGCCGTTTCGTGCGCCACG                     | CCGGCTTGCTACGTC<br>GTATATGAT              | [A/G] |
| chr3H_17951104 <sup>2</sup> | GAAGGTGACCAAGTTCATGCTC<br>ACTTGTGTTCTTGTCTCCTC                    | GAAGGTCGGAGTCAACGGATT<br>CACTTGTGTTCTTGTCTCCTT                    | TTGTCAGCGGCGAGCG<br>CACTAA                | [G/A] |
| chr3H_28161638 <sup>2</sup> | GAAGGTGACCAAGTTCATGCTC<br>GTCTTTCCGCCCTGAGTTTG                    | GAAGGTCGGAGTCAACGGATT<br>CCGTCTTTCCGCCCTGAGTTTA                   | GAAGTCGCCAGCTGTT<br>GAAGTTCTT             | [C/T] |
| chr3H_28805649 <sup>2</sup> | GAAGGTGACCAAGTTCATGCTC<br>GACGGTCCATTCTGCAC                       | GAAGGTCGGAGTCAACGGATT<br>GCTCGACGGTCCATTCTGCAA                    | TCTTGATGCTGACATGT<br>ATATGTTCTTGAT        | [G/T] |

<sup>1</sup> markers used to confirm heterozygosity of F<sub>1</sub> plants

<sup>2</sup> markers used to confirm *mov2* position

<sup>3</sup> markers used for mapping with F<sub>2</sub> segregants

<sup>4</sup> markers used for mapping with F<sub>3</sub> recombinants

**Supplementary Table S3.** PCR primer sequences for testing the presence of genes upstream and downstream of *HvSL1* (bold) on chromosome 3H.

| Gene ID                        | Forward primer                 | Reverse primer                 |
|--------------------------------|--------------------------------|--------------------------------|
| <i>HORVU3Hr1G003690</i>        | GGTTACTTTACCCITTCGATGTTCC      | ACGAAGTAGTGCCTCCCGAAG          |
| <i>HORVU3Hr1G003760</i>        | CTAGCTAGCGAGCGCTTATACC         | TGGGAGGTGCATCTCATCAGTGC        |
| <b><i>HORVU3Hr1G003740</i></b> | <b>CCAAACCAACACTTTAAGACTGC</b> | <b>TCTTATGGGGAGTAAAAAGGACC</b> |
| <i>HORVU3Hr1G003810</i>        | GGGTGTAATCTGGTTGCTAATCC        | ATCGACGTATCCTGATTCATTCC        |
| <i>HORVU3Hr1G003820</i>        | GTTTAGCAGTACGCATGAGACCC        | AGCTAGTAGGGAGTCCTTGGAGG        |

**Supplementary Table S4.** PCR primer sequences for testing the presence of barley B-class genes.

| Gene name       | Gene ID                 | Forward primer          | Reverse primer           |
|-----------------|-------------------------|-------------------------|--------------------------|
| <i>HvGAPDH</i>  | <i>HORVU7Hr1G074690</i> | GTGAGGCTGGTGCTGATTACG   | TGGTGCAGCTAGCATTTGAGAC   |
| <i>HvMADS2</i>  | <i>HORVU3Hr1G091000</i> | GCCCCAAGATACGAACCCTTCC  | GGTGGTGCAAACCTACAGTGAGG  |
| <i>HvMADS2</i>  | <i>HORVU3Hr1G091000</i> | GTGTGTCCGATTTGATCTACTCC | CAAGATCCCCTCTATCCTGTATCG |
| <i>HvMADS4</i>  | <i>HORVU1Hr1G063620</i> | ACACTCCACAGAGACAAGGG    | GTTGGGAAACAACCTAGCACTGG  |
| <i>HvMADS16</i> | <i>HORVU7Hr1G091210</i> | CCCTCGTCCACTTTCTTCTCC   | CGACACAAGGCAAGGTAAACG    |

**Supplementary Table S5.** PCR primer sequences for testing the presence of genes upstream and downstream of *HvMADS16* (bold) on chromosome 7H.

| Gene ID                        | Forward primer               | Reverse primer                |
|--------------------------------|------------------------------|-------------------------------|
| <i>HORVU7Hr1G091170</i>        | AGATATGAGATTGACAAGGTCCTG     | GGTAGAAGAATAAGGTTCCACTTGC     |
| <i>HORVU7Hr1G091180</i>        | GAACTGAAGTGAAGTGTGATGG       | CAGGTGTGATACGAGTTGAAGG        |
| <i>HORVU7Hr1G091180</i>        | GAATGAGATGTTGTGACTTGTGCG     | CACATTGTAATCCCTTCGTCTCG       |
| <i>HORVU7Hr1G091200</i>        | AGTAGAAAGGGGAAATTTAGTAGCG    | TGAGCATGATGATGTTGAAGGAG       |
| <b><i>HORVU7Hr1G091210</i></b> | <b>CCCTCGTCCACTTTCTTCTCC</b> | <b>CAATACACAGTCGAGCACTACG</b> |
| <i>HORVU7Hr1G091220</i>        | GGAATCGGAGTAGACGCAAGC        | GTGGCTAACGTCGATGGACC          |
| <i>HORVU7Hr1G091220</i>        | AAACCTTGGGTCGAGTAAAGCG       | TGTTGGAACAGCACCTAACACC        |
| <i>HORVU7Hr1G091230</i>        | CAGTTATTGACAGACAGAGCTCC      | GGTATGGGTACAGGATGTCATC        |
| <i>HORVU7Hr1G091240</i>        | GGCCATCAGGTCCTGTTTCAG        | TTTCAGCTCCGTTGTAGTGTGG        |
| <i>HORVU7Hr1G091250</i>        | AGTGAGACAATCGACAGTAGCG       | TGACAGTTGAGTGAGAGTGAGC        |

**Supplementary Table S6.** qRT-PCR primer sequences.

| Gene name        | Gene ID                 | Forward primer           | Reverse primer             | Acquisition Temperature (°C) |
|------------------|-------------------------|--------------------------|----------------------------|------------------------------|
| <i>HvGAPDH</i>   | <i>HORVU7Hr1G074690</i> | GTGAGGCTGGTGCTGATTACG    | TGGTGCAGCTAGCATTGAGAC      | 82                           |
| <i>HvCYCLO</i>   | <i>HORVU6Hr1G012570</i> | CCTGTCGTGTCGTGGTCTAAA    | ACGCAGATCCAGCAGCCTAAAG     | 81                           |
| <i>HvTUB</i>     | <i>HORVU1Hr1G081280</i> | AGTGTCTGTCCACCCACTC      | AGCATGAAGTGGATCCTTGG       | 82                           |
| <i>HvHSP70</i>   | <i>HORVU5Hr1G113180</i> | CGACCAGGGCAACCGCACCAC    | ACGGTGTGATGGGGTTCATG       | 85                           |
| <i>HvMADS2</i>   | <i>HORVU3Hr1G091000</i> | CCAGCATGATATCGCCTTG      | TCGAGCCAGTGGTGGATAA        | 82                           |
| <i>HvKinase*</i> | <i>HORVU1Hr1G063610</i> | TTTGGCACCTTAGCCATCAT     | ATGCCAAGATGTTCTGGTC        | 76                           |
| <i>HvMADS4*</i>  | <i>HORVU1Hr1G063620</i> | ATGGAGCTCGGGTACCATC      | CCTGCAGGTAGATGGAGCA        | 80                           |
| <i>HvMADS16</i>  | <i>HORVU7Hr1G091210</i> | CCCAGGAGGCATACAAGAATCTGC | GCGGAAGGCGTACATGTCAGC      | 83                           |
| <i>HvMADS3</i>   | <i>HORVU3Hr1G026650</i> | GCAGCAGCAGCATTACTCC      | ACACATGCACGCGACAGTA        | 80                           |
| <i>HvMADS58</i>  | <i>HORVU1Hr1G029220</i> | ATCATGCAGCAGCCTCAGT      | GGTGTGGCCAAGCCTTAAT        | 77                           |
| <i>HvMADS13</i>  | <i>HORVU1Hr1G023620</i> | TCAGCTGAACCTAGGCTGC      | TTTGACAGGAATAGTTGAGTACTGGT | 80                           |
| <i>HvDL</i>      | <i>HORVU4Hr1G067780</i> | CCATGCAAGAGGCTGATGGACACG | GCGGCTGGTTCCTCTGCAGTCAG    | 83                           |
| <i>HvSL1</i>     | <i>HORVU3Hr1G003740</i> | GGAGGAGGAGGATTCAGGGGAGG  | GCGTCGTGCTGTAGAGGTAGTGG    | 83                           |

\* Gene *HvMADS4* overlaps with *HvKinase*. *HvKinase* expression was also considered when assessing *HvMADS4* transcript abundance.

**Supplementary Table S7.** Primer sequences for *HvSL1* CRISPR knockout. gRNA sequence is underlined.

| #     | Gene ID                 | Forward primer                                   | Reverse primer                                    |
|-------|-------------------------|--------------------------------------------------|---------------------------------------------------|
| gRNA1 | <i>HORVU3Hr1G003740</i> | <u>CTTGCTTGCCGTA</u> CTCCTCGTTTTAGAGCT<br>AGAAAT | GAGGAGT <u>ACGGCAAGCAAGCAACACAAG</u> CGGC<br>AGC  |
| gRNA2 | <i>HORVU3Hr1G003740</i> | <u>CCTGCACTCGTACACCTTGC</u> TTTTAGAG<br>CTAGAAAT | <u>GCAAGGTGTACGAGTGCAGGCGGCAG</u> CCAAG<br>CCAGCA |

**Supplementary Table S8.** Primer sequence for cloning of *in situ hybridization* antisense (AS) and sense (S) probes. The T7 promoter sequence is underlined.

| Gene name            | Gene ID                 | Forward primer                                         | Reverse primer                                          |
|----------------------|-------------------------|--------------------------------------------------------|---------------------------------------------------------|
| <i>HvSL1</i> (AS)    | <i>HORVU3Hr1G003740</i> | GCACCTTCCAATCTCCATTGC                                  | <u>TAATACGACTCACTATAGGGTTGAGA</u><br>CTTGCCGAACCTGAGG   |
| <i>HvSL1</i> (S)     | <i>HORVU3Hr1G003740</i> | <u>TAATACGACTCACTATAGGGGCACC</u><br>TTCCAAATCTCCATTGC  | TTGAGACTTGCCGAACCTGAGG                                  |
| <i>HvMADS2</i> (AS)  | <i>HORVU3Hr1G091000</i> | CCTCAGTGCGGAGATTGATCG                                  | <u>TAATACGACTCACTATAGGGGCTGC</u><br>AAAGTCCCTGTCTGG     |
| <i>HvMADS2</i> (S)   | <i>HORVU3Hr1G091000</i> | <u>TAATACGACTCACTATAGGGCCTCA</u><br>GTGCGGAGATTGATCG   | GCTGCAAAGTCCCTGTCTGG                                    |
| <i>HvMADS4</i> (AS)  | <i>HORVU1Hr1G063620</i> | CTCAGGCATATGAAAGGCGAGG                                 | <u>TAATACGACTCACTATAGGGATGGA</u><br>GCACCAGTTCAGACAGG   |
| <i>HvMADS4</i> (S)   | <i>HORVU1Hr1G063620</i> | <u>TAATACGACTCACTATAGGGCTCAG</u><br>GCATATGAAAGGCGAGG  | ATGGAGCACCAGTTCAGACAGG                                  |
| <i>HvMADS16</i> (AS) | <i>HORVU7Hr1G091210</i> | GCAAAGGATGGGTGAAGATCTGG                                | <u>TAATACGACTCACTATAGGGGCGGA</u><br>AGGCGTACATGTCAGC    |
| <i>HvMADS16</i> (S)  | <i>HORVU7Hr1G091210</i> | <u>TAATACGACTCACTATAGGGGCAAA</u><br>GGATGGGTGAAGATCTGG | GCGGAAGGCGTACATGTCAGC                                   |
| <i>HvMADS3</i> (AS)  | <i>HORVU3Hr1G026650</i> | AGGTTAACATGCAGCAGCAGC                                  | <u>TAATACGACTCACTATAGGGGGAA</u><br>GATATGCAACGCGATGG    |
| <i>HvMADS3</i> (S)   | <i>HORVU3Hr1G026650</i> | <u>TAATACGACTCACTATAGGGAGGTT</u><br>AACATGCAGCAGCAGC   | GGGAAGATATGCAACGCGATGG                                  |
| <i>HvMADS13</i> (AS) | <i>HORVU1Hr1G023620</i> | ATCAGGGCCAGGAAGAATGAGC                                 | <u>TAATACGACTCACTATAGGGCAGGTT</u><br>GACTAGAACTGATGAGCC |
| <i>HvMADS13</i> (S)  | <i>HORVU1Hr1G023620</i> | <u>TAATACGACTCACTATAGGGATCAG</u><br>GGCCAGGAAGAATGAGC  | CAGGTTGACTAGAACTGATGAGCC                                |
| <i>HvDL</i> (AS)     | <i>HORVU4Hr1G067780</i> | TTCCATGCAAGAGGCTGATGG                                  | <u>TAATACGACTCACTATAGGGGCTTTG</u><br>ATACGCTGTATTTCTCC  |
| <i>HvDL</i> (S)      | <i>HORVU4Hr1G067780</i> | <u>TAATACGACTCACTATAGGGTTCCAT</u><br>GCAAGAGGCTGATGG   | GCTTTGATACGCTGTATTTCTCC                                 |

**Supplementary Table S9.** Primer sequences for BiFC cloning. HindIII restriction site is underlined in all forward primers, XmaI restriction site is underlined in all reverse primers.

| Gene name                | Gene ID                 | Forward primer                              | Reverse primer                                  |
|--------------------------|-------------------------|---------------------------------------------|-------------------------------------------------|
| <i>HvMADS2</i>           | <i>HORVU3Hr1G091000</i> | TTCA <u>AAGCTT</u> ACATGGGGCGCGGAAG<br>ATCG | <u>ACCCGGG</u> ATCTAGGTGTCCTCCTGCA<br>GATTGGG   |
| <i>HvMADS4</i>           | <i>HORVU1Hr1G063620</i> | TTCA <u>AAGCTT</u> ACATGGGGCGCGCAAG<br>ATCG | <u>ACCCGGG</u> ATCTACTTGTCTCCTGCA<br>AGTTGGGGTG |
| <i>HvMADS16</i>          | <i>HORVU7Hr1G091210</i> | TTCA <u>AAGCTT</u> ACATGGGGCGGGGAAG<br>ATCG | <u>ACCCGGG</u> TATTATCCGAGGCGCAGGT<br>CGTG      |
| $\Delta$ <i>HvMADS16</i> | <i>HORVU7Hr1G091210</i> | TTCA <u>AAGCTT</u> ACATGGGGCGGGGAAG<br>ATCG | <u>ACCCGGG</u> TACTTGATGTCGGTGCCGG<br>TGC       |



**Supplementary Table S10.** Variation in floral organ frequency in wild-type and *mov2.g*. As an example, phenotypic variation is reported for six individual *mov2.g* florets from different spikes. All *mov2.g* florets contained 2 unaltered lodicules. WT indicates a wild-type barley floret.

| Floret #      | Stamen | Carpel/<br>carpel-like | Partially converted<br>stamen | Comments                                     |
|---------------|--------|------------------------|-------------------------------|----------------------------------------------|
| WT            | 3      | 1                      | 0                             |                                              |
| <i>mov2.g</i> | 0      | 4                      | 0                             | At least 2 carpels appear to contain ovules  |
| <i>mov2.g</i> | 0      | 5                      | 0                             |                                              |
| <i>mov2.g</i> | 0      | 1                      | 3                             | Three carpelloid/partially converted stamens |
| <i>mov2.g</i> | 0      | 3                      | 1                             |                                              |
| <i>mov2.g</i> | 0      | 6                      | 0                             | Carpel-like organs vary in shape and size    |
| <i>mov2.g</i> | 0      | 7                      | 0                             | Several exposed ovule-like structures        |

**Supplementary Table S11.** Annotated genes present in the mapped *mov2* critical interval between flanking markers chr3H\_9748112 and chr3H\_10289104. Annotations and genomic coordinates are based on the Morex reference assembly Hv\_IBSC\_PGSB\_v2, gene order is based on Morex Scaffold\_1432 (Dr. Martin Mascher, IPK Gatersleben, Germany). *HvSL1* (*HORVU3Hr1G003740*) is indicated in bold, genes tested by PCR are indicated with \*.

| Gene                             | Start            | End              | Strand | Annotation                            |
|----------------------------------|------------------|------------------|--------|---------------------------------------|
| <i>HORVU3Hr1G003690</i> *        | 9,737,630        | 9,749,764        | +      | N.A.                                  |
| <i>HORVU3Hr1G003700</i>          | 9,753,370        | 9,754,129        | -      | Undescribed protein                   |
| <i>HORVU3Hr1G003710</i>          | 9,756,062        | 9,756,300        | -      | Undescribed protein                   |
| <i>HORVU3Hr1G003720</i>          | 9,757,456        | 9,764,144        | -      | Unknown function                      |
| <i>HORVU3Hr1G003730</i>          | 9,774,072        | 9,774,466        | -      | Undescribed protein                   |
| <i>HORVU3Hr1G003760</i> *        | 9,942,084        | 9,945,779        | +      | Protein of unknown function (DUF1666) |
| <i>HORVU3Hr1G003750</i>          | 9,937,908        | 9,938,930        | -      | Undescribed protein                   |
| <b><i>HORVU3Hr1G003740</i> *</b> | <b>9,908,524</b> | <b>9,910,297</b> | -      | <b>Zinc finger protein 6</b>          |
| <i>HORVU3Hr1G003780</i>          | 10,031,768       | 10,032,424       | -      | Undescribed protein                   |
| <i>HORVU3Hr1G003770</i>          | 10,030,637       | 10,031,653       | -      | Undescribed protein                   |
| <i>HORVU3Hr1G003800</i>          | 10,168,437       | 10,169,618       | -      | Undescribed protein                   |
| <i>HORVU3Hr1G003810</i> *        | 10,169,902       | 10,172,670       | +      | Disease resistance protein            |
| <i>HORVU3Hr1G003820</i> *        | 10,173,750       | 10,180,522       | +      | Synaptotagmin A                       |
| <i>HORVU3Hr1G003830</i>          | 10,180,811       | 10,181,062       | -      | Undescribed protein                   |
| <i>HORVU3Hr1G003840</i>          | 10,200,846       | 10,209,364       | +      | BnaA07g10090D protein                 |
| <i>HORVU3Hr1G003850</i>          | 10,208,187       | 10,213,828       | -      | Nuclease S1                           |
| <i>HORVU3Hr1G003870</i>          | 10,259,028       | 10,259,724       | +      | Endonuclease 2                        |
| <i>HORVU3Hr1G003790</i>          | 10,058,110       | 10,058,378       | +      | Undescribed protein                   |
| <i>HORVU3Hr1G003860</i>          | 10,224,976       | 10,227,068       | +      | Endonuclease 2                        |
| <i>HORVU3Hr1G003880</i>          | 10,288,324       | 10,289,509       | -      | Unknown function                      |

**Supplementary Table S12.** BLASTp results using barley HvSL1 as query against the rice genome (RGAP 7). All hits are shown.

| Gene ID                       | E-value | Query coverage (%) | Sequence identity (%) |
|-------------------------------|---------|--------------------|-----------------------|
| <i>LOC_Os01g03840 (OsSL1)</i> | 6e-88   | 99.25              | 65.4                  |
| <i>LOC_Os01g32920</i>         | 1e-06   | 14.98              | 52.5                  |

**Supplementary Table S13.** BLASTp results using rice OsSL1 as query against the barley genome (Hv\_IBSC\_PGSB\_v2). Only the top five hits are shown.

| Gene ID                         | E-value | Query coverage (%) | Sequence identity (%) |
|---------------------------------|---------|--------------------|-----------------------|
| <i>HORVU3Hr1G003740 (HvSL1)</i> | 3.2e-87 | 97                 | 65.0                  |
| <i>HORVU3Hr1G007060</i>         | 4.2e-07 | 11                 | 54.8                  |
| <i>HORVU5Hr1G103440</i>         | 8e-07   | 13                 | 51.4                  |
| <i>HORVU4Hr1G085640</i>         | 8e-07   | 22                 | 59.4                  |
| <i>HORVU5Hr1G018830</i>         | 1.1e-06 | 16                 | 62.1                  |

**Supplementary Table S14.** Observed segregation ratios of *mov1* phenotype in heterozygote growing material.

| Group # | Observed <i>mov1</i> phenotype | Observed wild-type phenotype | Total | $\chi^2$ value | P-value | Output                      |
|---------|--------------------------------|------------------------------|-------|----------------|---------|-----------------------------|
| 1       | 68 (24%)                       | 214 (76%)                    | 282   | 0.118          | 0.731   | <b>ACCEPT H<sub>0</sub></b> |
| 2       | 10 (25%)                       | 30 (75%)                     | 40    | 0.000          | 1.000   | <b>ACCEPT H<sub>0</sub></b> |
| 3       | 10 (26%)                       | 29 (74%)                     | 39    | 0.009          | 0.926   | <b>ACCEPT H<sub>0</sub></b> |
| 4       | 9 (19%)                        | 39 (81%)                     | 48    | 1.000          | 0.317   | <b>ACCEPT H<sub>0</sub></b> |
| 5       | 41 (24%)                       | 133 (76%)                    | 174   | 0.192          | 0.662   | <b>ACCEPT H<sub>0</sub></b> |

H<sub>0</sub> = The observed phenotypes segregate with a 3:1 ratio

H<sub>1</sub> = Not H<sub>0</sub>; observed phenotypes segregate differently from 3:1 ratio

Degrees of freedom (DF) = 1

**Supplementary Table S15.** Genes on chromosome 7H tested by PCR. All genes were present in *mov1*, except for genes shown in bold. Annotations and genomic coordinates based on the Morex reference assembly Hv\_IBSC\_PGSB\_v2. Presence of gene *HORVU7Hr1G091190* could not be tested due to sequence repetitiveness and is therefore considered within the deletion.

| Gene                           | Start              | End                | Strand | Annotation                              |
|--------------------------------|--------------------|--------------------|--------|-----------------------------------------|
| <i>HORVU7Hr1G091170</i>        | 556,426,170        | 556,428,917        | +      | Protein FMP32, mitochondrial            |
| <i>HORVU7Hr1G091180</i>        | 556,432,734        | 556,434,307        | +      | B-box zinc finger family protein        |
| <b><i>HORVU7Hr1G091190</i></b> | <b>557,017,373</b> | <b>557,018,262</b> | -      | <b>40S ribosomal protein</b>            |
| <b><i>HORVU7Hr1G091200</i></b> | <b>557,181,329</b> | <b>557,182,073</b> | -      | <b>Undescribed protein</b>              |
| <b><i>HORVU7Hr1G091210</i></b> | <b>557,244,345</b> | <b>557,245,839</b> | -      | <b>MADS-box transcription factor 16</b> |
| <i>HORVU7Hr1G091220</i>        | 557,387,804        | 557,392,562        | +      | UPF0183 protein                         |
| <i>HORVU7Hr1G091230</i>        | 557,392,887        | 557,396,669        | +      | Unknown protein                         |
| <i>HORVU7Hr1G091240</i>        | 557,397,068        | 557,398,785        | -      | Alpha-amylase-like                      |
| <i>HORVU7Hr1G091250</i>        | 557,426,822        | 557,429,314        | -      | Alpha-amylase-like                      |

**Supplementary Fig. S1. Histological sections of *mov2.g* carpels.** Transverse sections of mature (A) wild-type and (B) *mov2.g* carpels stained with toluidine blue. Inset in (A) shows characteristics of a wild-type female gametophyte. Red arrows indicate: (I) synergid cells, (II) egg cell, (III) central cell and (IV) antipodal cells in serial sections. Black asterisks indicate ovules, whereas black arrows indicate additional carpel-like structures. Scale bars: 100  $\mu$ m.

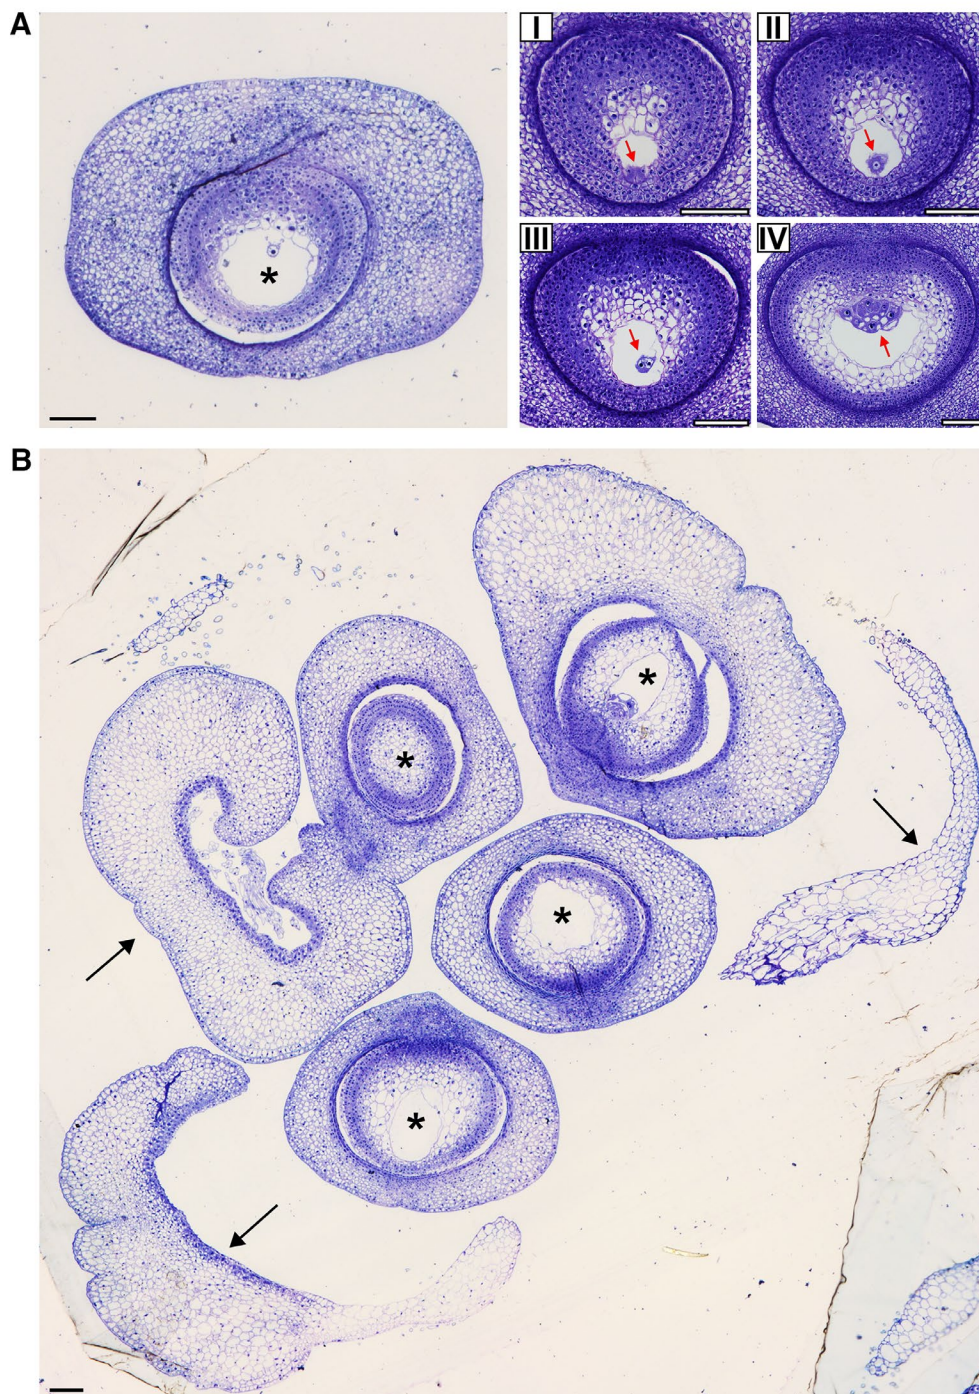

**Supplementary Fig. S2. Spike morphology in wild-type and *mov2.g* plants.** Representative images for (A) wild type and (B-D) *mov2.g* plants. Scale bars: 1 cm.

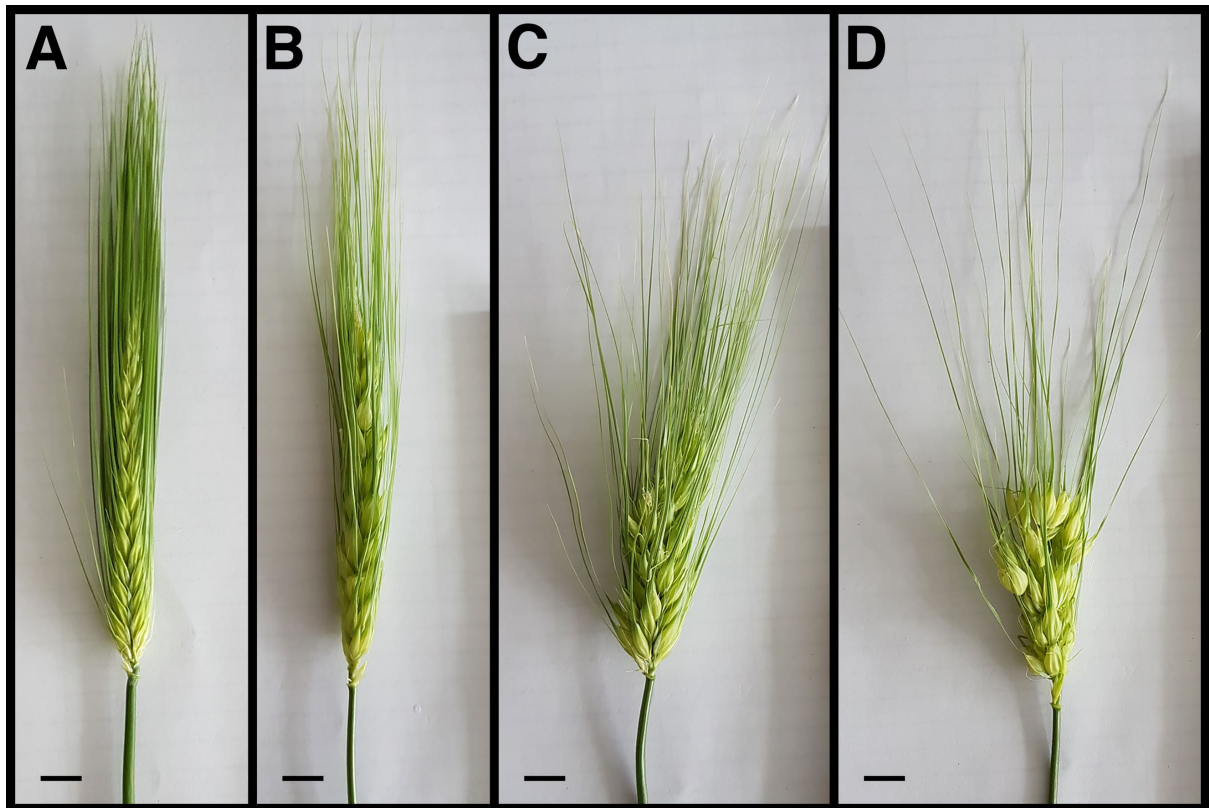

**Supplementary Fig. S3. Mapping of the *mov2* locus in a *mov2.g* x Morex bi-parental population.** *mov2* was initially mapped to a ~1.9 Mb interval between markers chr3H\_9095799 and chr3H\_11039299 based on 352 F<sub>2</sub> segregants. Fine mapping using 179 F<sub>3</sub> recombinants reduced the critical interval to ~449 Kb between markers chr3H\_9748112 and chr3H\_10289104. Markers are represented by vertical black lines along the chromosome. Marker order is based on the genetic map and recombination frequency (%) is reported at the bottom for each marker. Examples of mapping in F<sub>3</sub> recombinants: line names are indicated on the side, lines exhibiting the *mov2.g* phenotype are indicated in bold. Green: *mov2.g* allele; grey: Morex allele.

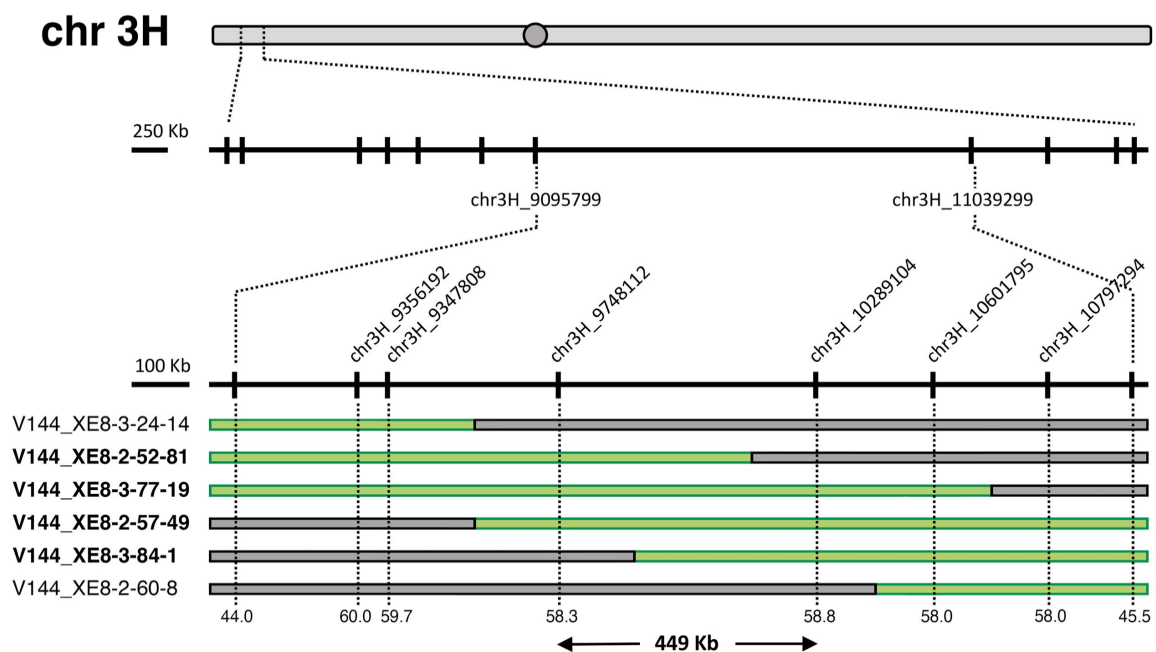

**Supplementary Fig. S4. Heatmap of gene expression for genes in the critical *mov2* interval.** Heatmap shows RNAseq values (RPKM) in different plant tissues for genes present in the mapped interval. Gene order is based on Morex Scaffold\_1432 (Dr. Martin Mascher, IPK Gatersleben, Germany). *HvSL1* (*HORVU3Hr1G003740*) is indicated in bold and with red box. For each tissue, development based on the Zadoks or Waddington growth scale is provided.

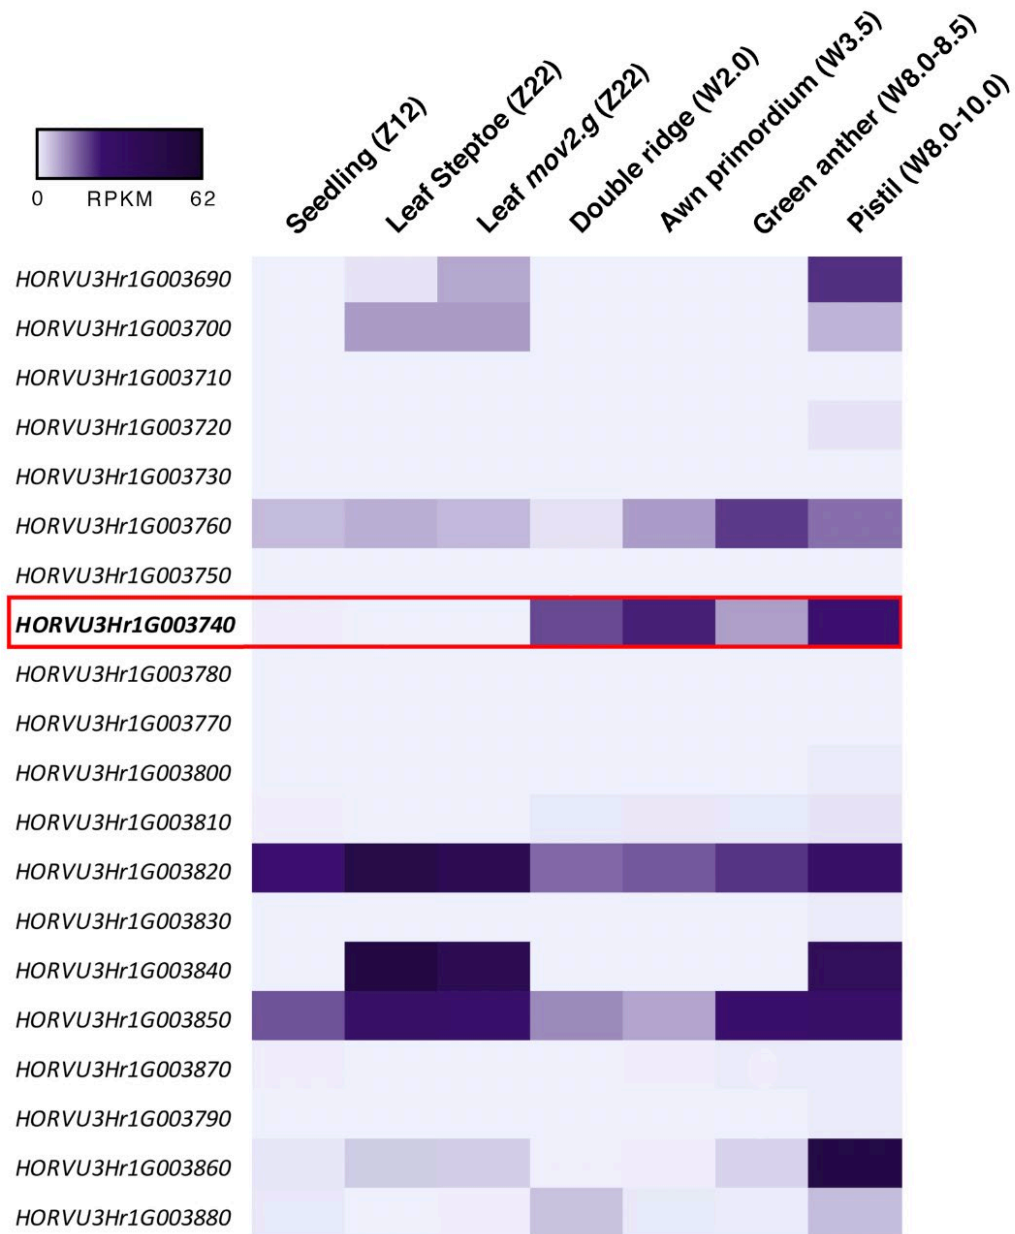

**Supplementary Fig. S5. *HvSL1* and *OsSL1* gene models and alignment. (A)** Schematic representation of barley (*HvSL1*) and rice (*OsSL1*) gene models. For each gene, the length in base pairs of Untranslated Regions (UTR – white boxes), protein-coding regions (black boxes) and introns (solid line) is indicated. **(B)** Protein alignment of barley (*HvSL1*) and rice (*OsSL1*).

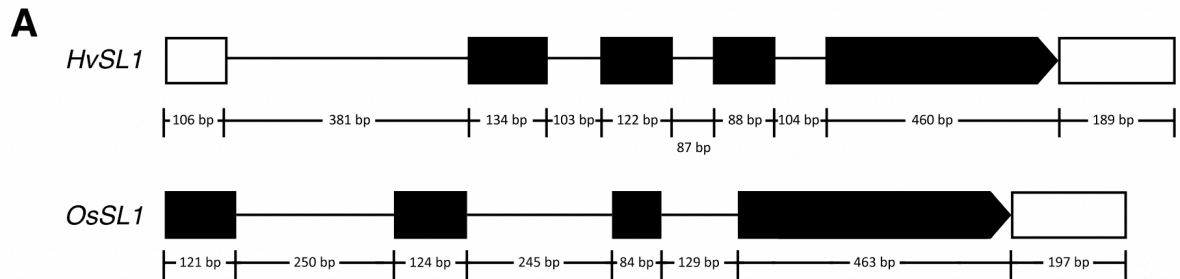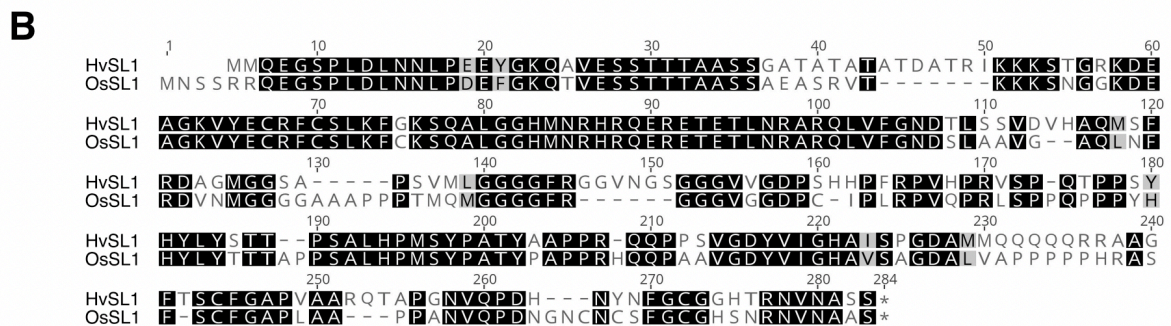



**Supplementary Fig. S6. *HvSL1* deletion in *mov2.g*.** (A) *HvSL1* appears to be absent in *mov2.g* plants when assayed by PCR. (B) *HvSL1* is expressed in wild-type (solid black line), but not in *mov2.g* (dashed black line) developing inflorescences at stages W2.0 (double ridge), W3.5 (stamen primordia), W4.5 (carpel primordium) and W6.0 (stamen and carpel development). Error bars represent  $\pm$  Standard Error. For each timepoint, two-tailed T-test P-values  $\leq 0.05$  (\*),  $\leq 0.005$  (\*\*) and  $\leq 0.001$  (\*\*\*) are shown for differences between wild type and *mov2.g*. For each sample n = 3 independent biological replicates.

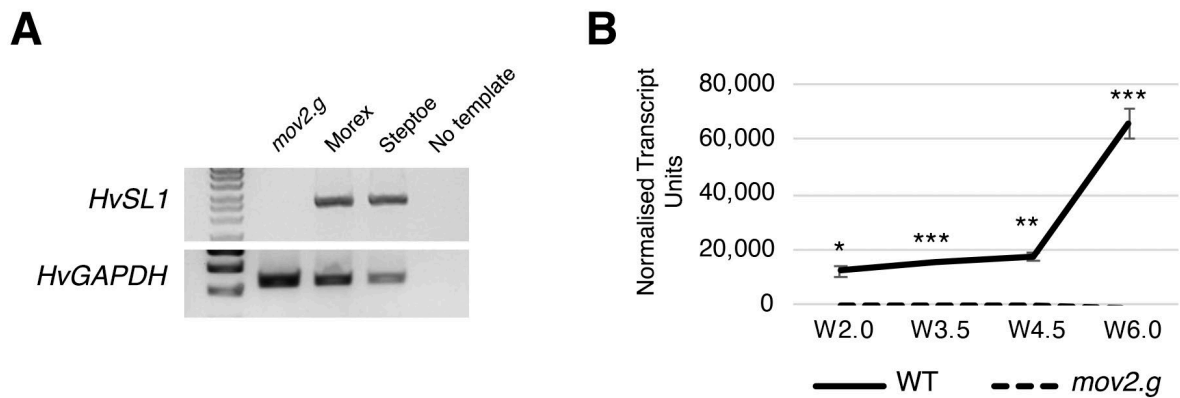

**Supplementary Fig. S7. CRISPR design and analysis of *Hvs11*-knockout plants. (A)** Schematic representation of the *HvSL1* gene structure showing the position of gRNA1 and gRNA2 in red, protein-coding regions as grey boxes and UTR regions as white boxes. **(B)** Edits detected in gRNA1 (left column) and gRNA2 (right column) in CRISPR *Hvs11*-knockout plants with relative insertions/deletions shown in red and indicated in brackets. PAM sequence is underlined.

**A**

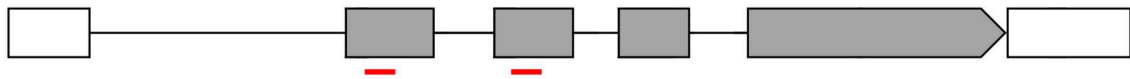

**B**

|                 |                                         |                             |
|-----------------|-----------------------------------------|-----------------------------|
|                 | ▼                                       |                             |
| <u>HvSL1-1</u>  | WT: GCTTGCTTGCCGTA <u>CTC</u> -CTCCGG   | WT: CCTGCACTCGTACACCTTGCCGG |
|                 | (+1) GCTTGCTTGCCGTA <u>CTC</u> TCTC     |                             |
|                 | (-1) GCTTGCTTGCCGTA <u>CTC</u> --CTC    |                             |
| <u>HvSL1-3</u>  | WT: GCTTGCTTGCCGTA <u>CTC</u> CTCCGG    | WT: CCTGCACTCGTACACCTTGCCGG |
|                 | (-1) GCTTGCTTGCCGTA <u>CTC</u>          |                             |
|                 | (+89/-6) <b>GCTCAAGTCTCCAACA</b> ACT... |                             |
| <u>HvSL1-5</u>  | WT: GCTTGCTTGCCGTA <u>CTC</u> -CTCCGG   | WT: CCTGCACTCGTACACCTTGCCGG |
|                 | (+1) GCTTGCTTGCCGTA <u>CTC</u> TCTC     |                             |
|                 | (-1) GCTTGCTTGCCGTA <u>CTC</u> --CTC    |                             |
| <u>HvSL1-6</u>  | WT: GCTTGCTTGCCGTA <u>CTC</u> CTCCGG    | WT: CCTGCACTCGTACACCTTGCCGG |
|                 | (-1) GCTTGCTTGCCGTA <u>CTC</u>          |                             |
| <u>HvSL1-10</u> | WT: GCTTGCTTGCCGTA <u>CTC</u> -CTCCGG   | WT: CCTGCACTCGTACACCTTGCCGG |
|                 | (+1) GCTTGCTTGCCGTA <u>CTC</u> TCTC     |                             |
|                 | (-1) GCTTGCTTGCCGTA <u>CTC</u> --CTC    |                             |
|                 | (-2) GCTTGCTTGCCGTA <u>CTC</u> ---CTC   |                             |

**Supplementary Fig. S8. BiFC assays showing interaction between barley B-class genes.** nYFP indicates N-terminal of YFP (1-174), while cYFP indicates C-terminal split of YFP (175-241). Scale bars: 200  $\mu$ m. A previously published interaction between rice proteins OsERS1 and OsARC was used as positive control (Yang *et al.*, 2018). For each interaction, n = 4 independent transfections.

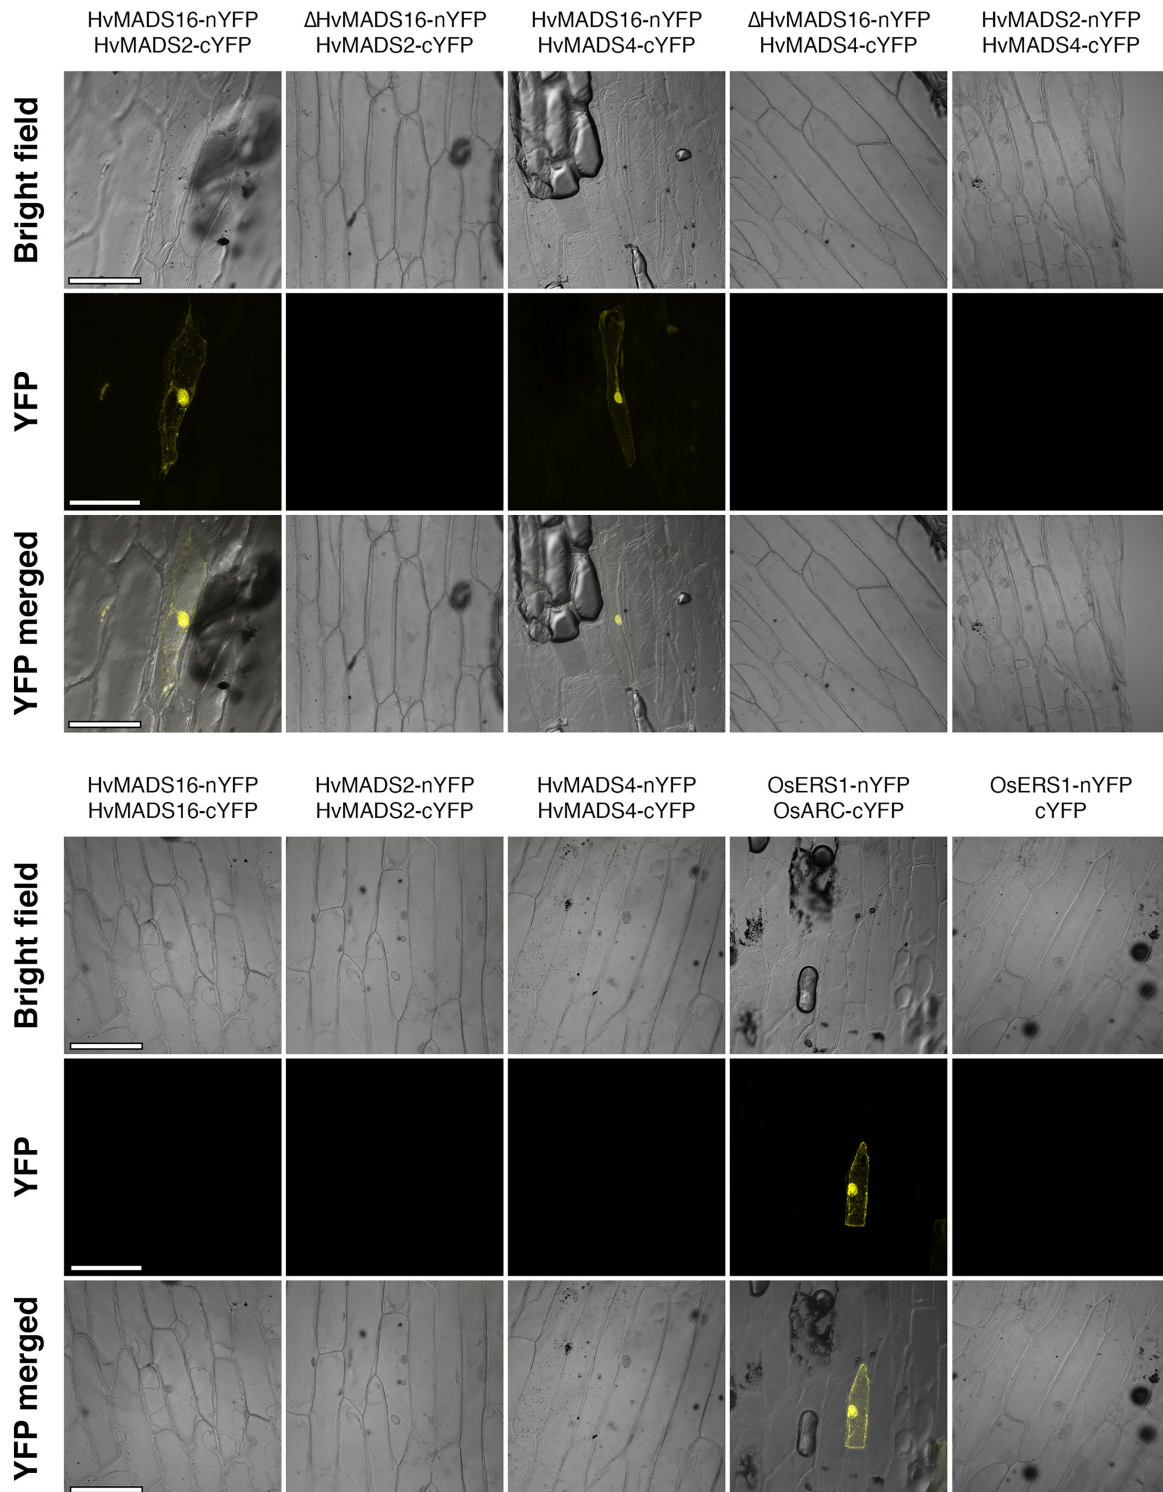

**Supplementary Fig. S9. Transfection efficiency and transcript abundance in barley protoplasts.** (A) Efficiency of protoplast transfection was calculated by averaging the number of protoplasts expressing YFP in three representative images. Scale bars: 100  $\mu$ m. (B) *HvSL1* expression as assayed by qRT-PCR in protoplasts transfected with mock or with a construct driving constitutive *HvSL1* expression. Constitutive *HvSL1* expression is driven by the Cauliflower Mosaic Virus 35S promoter. Fold change is reported relative to barley glyceraldehyde 3-phosphate dehydrogenase (*HvGAPDH*) and cyclophilin (*HvCYCLO*). (C) Expression of endogenous B-class genes *HvMADS2*, *HvMADS4* and *HvMADS16* in protoplasts transfected with mock or with a construct driving constitutive *HvSL1* expression. Fold change is reported relative to the mock condition. Two-tailed T-test P-value  $\leq 0.005$  (\*\*) is shown for differences between treatments, ns indicates no significant difference. For each sample n = 3 independent biological replicates.

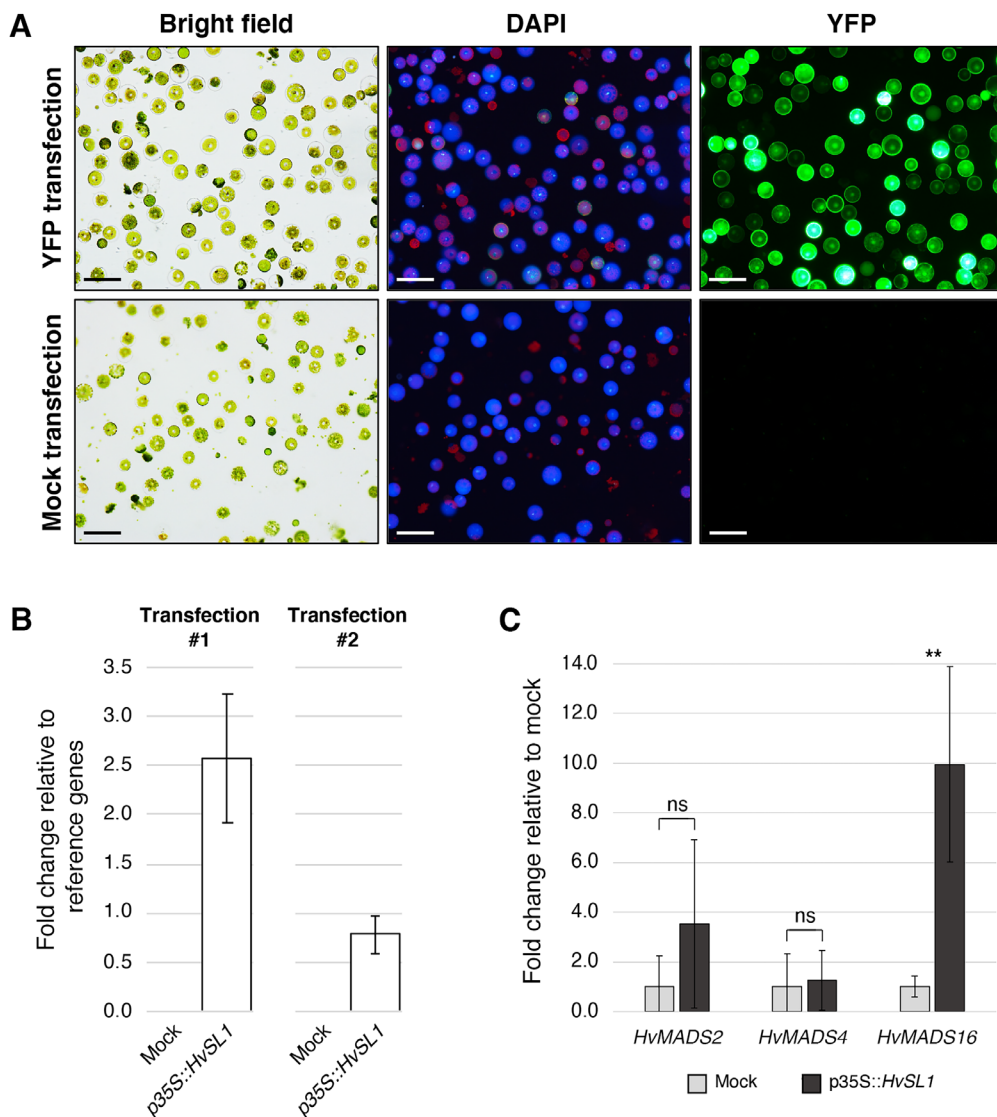

**Supplementary Fig. S10. Histological sections of *mov1* carpels.** Transverse sections of mature (A) wild-type and (B and C) *mov1* carpels stained with toluidine blue. Black asterisks indicate the ovule-like structures in the multiovary mutant. Scale bars: 100  $\mu$ m.

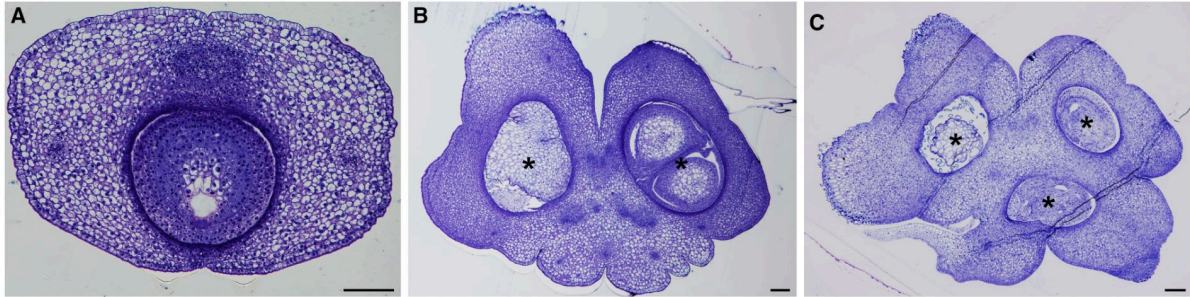

**Supplementary Fig. S11. Details of *mov1* inflorescence development.** Enlargement of the *mov1* inflorescence shown in Fig. 7 at W5.0, highlighting in greater detail the multiple florets (numbered 1 & 2) arising from a single floral meristem. Scale bars: 500  $\mu$ m.

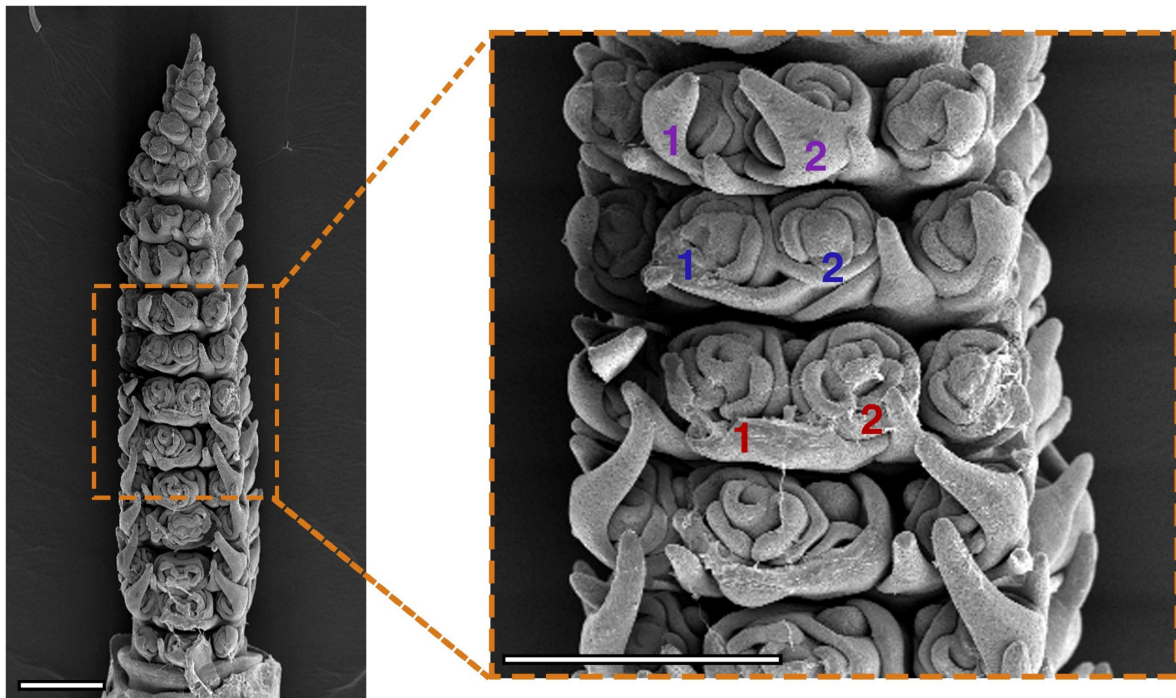

**Supplementary Fig. S12. Characterization of the *mov1* deletion and *HvMADS16*.** (A) *HvMADS16* is the only B-class gene physically absent in *mov1* when assayed by PCR. The barley glycerinaldehyde 3-phosphate dehydrogenase *HvGAPDH* gene was used as reference. (B) Transcript abundance of *HvMADS16* in a Steptoe tissue series as assayed by qRT-PCR. For details about tissue sampling refer to Materials and Methods. (C) Schematic representation of the deletion in *mov1* as assayed by PCR. Deletion size in *mov1* is estimated to be no bigger than 0.95 Mb, based on the Morex reference assembly Hv\_IBSC\_PGSA\_v2. (D) *HvMADS16* gene structure; length in base pairs of Untranslated Regions (UTR), protein-coding regions (black) and introns (solid line) is indicated. (E) Protein alignment of barley (*HvMADS16*) and rice (*OsMADS16*), sharing 88.3% sequence identity.

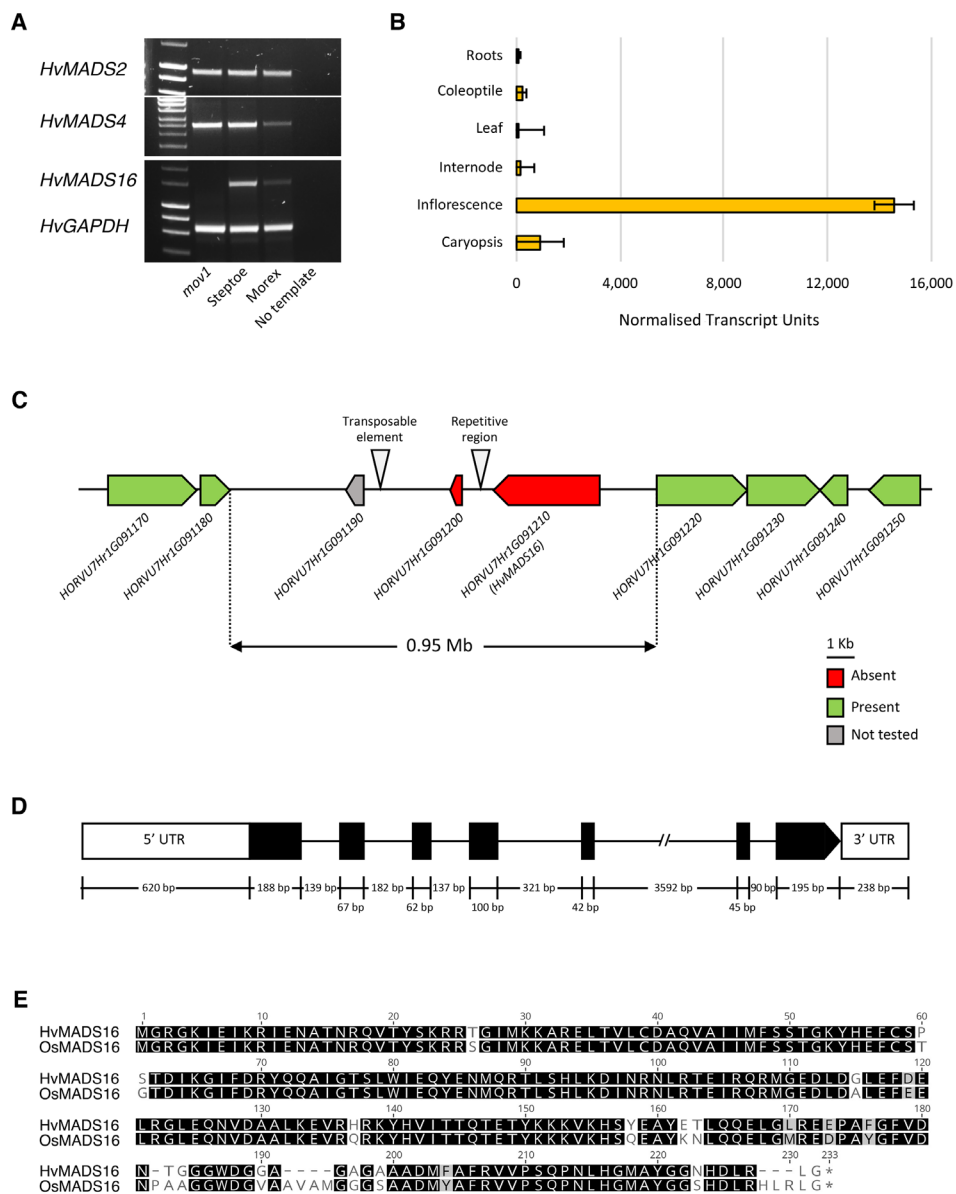

**Supplementary Fig. S13. *In situ* hybridization with sense probes on wild-type and *mov1* inflorescences.** Sense probes for *HvMADS16*, *HvMADS3*, *HvMADS13* and *HvDL* were assayed on wildtype (WT) and *mov1* inflorescences at stage W6.0. Lemma (le), lodicule (lo), stamen (st), carpel (ca), ovule (ov) and carpel-like structure (cl). Scale bars: 250  $\mu$ m.

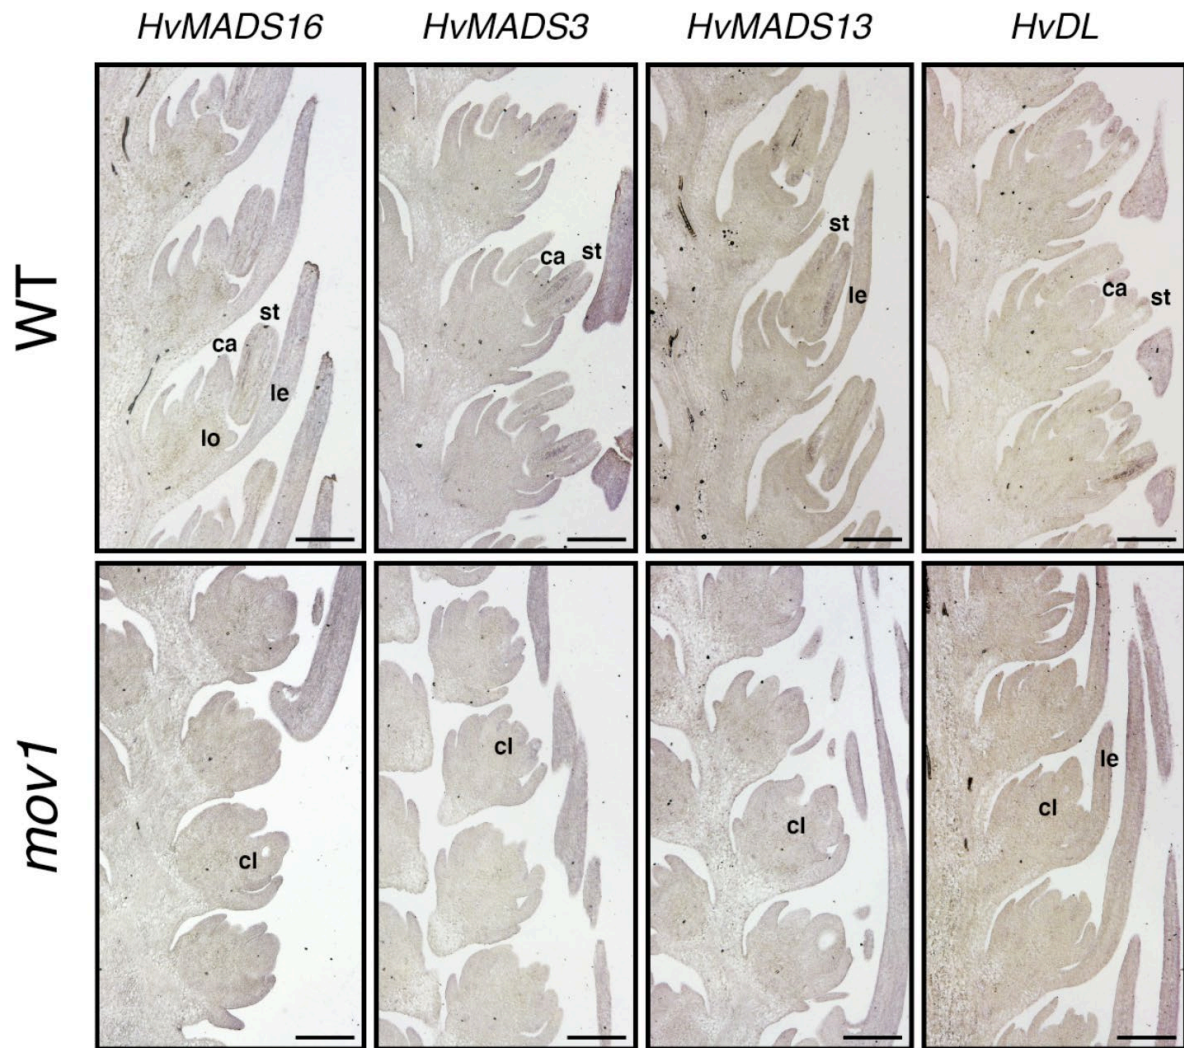

## Supplementary Information References

**Yang X, Li G, Tian Y, Song Y, Liang W, Zhang D.** 2018. A rice glutamyl-tRNA synthetase modulates early anther cell division and patterning. *Plant Physiology*. 177,728–744.
